# Supplementary material for: Aromatase inhibition remodels the clonal architecture of estrogen-receptor-positive breast cancers
Source: PubMed Central journal article supplement (PMC4980485; doi:10.1038/ncomms12498), 2016-08-09
Supplement: ncomms12498-s1.pdf [file ncomms12498-s1.pdf]

## **Supplementary Figures**

**Supplementary Figure 1: Somatic copy number alterations** detected by CopyCat and displayed after purity correction.

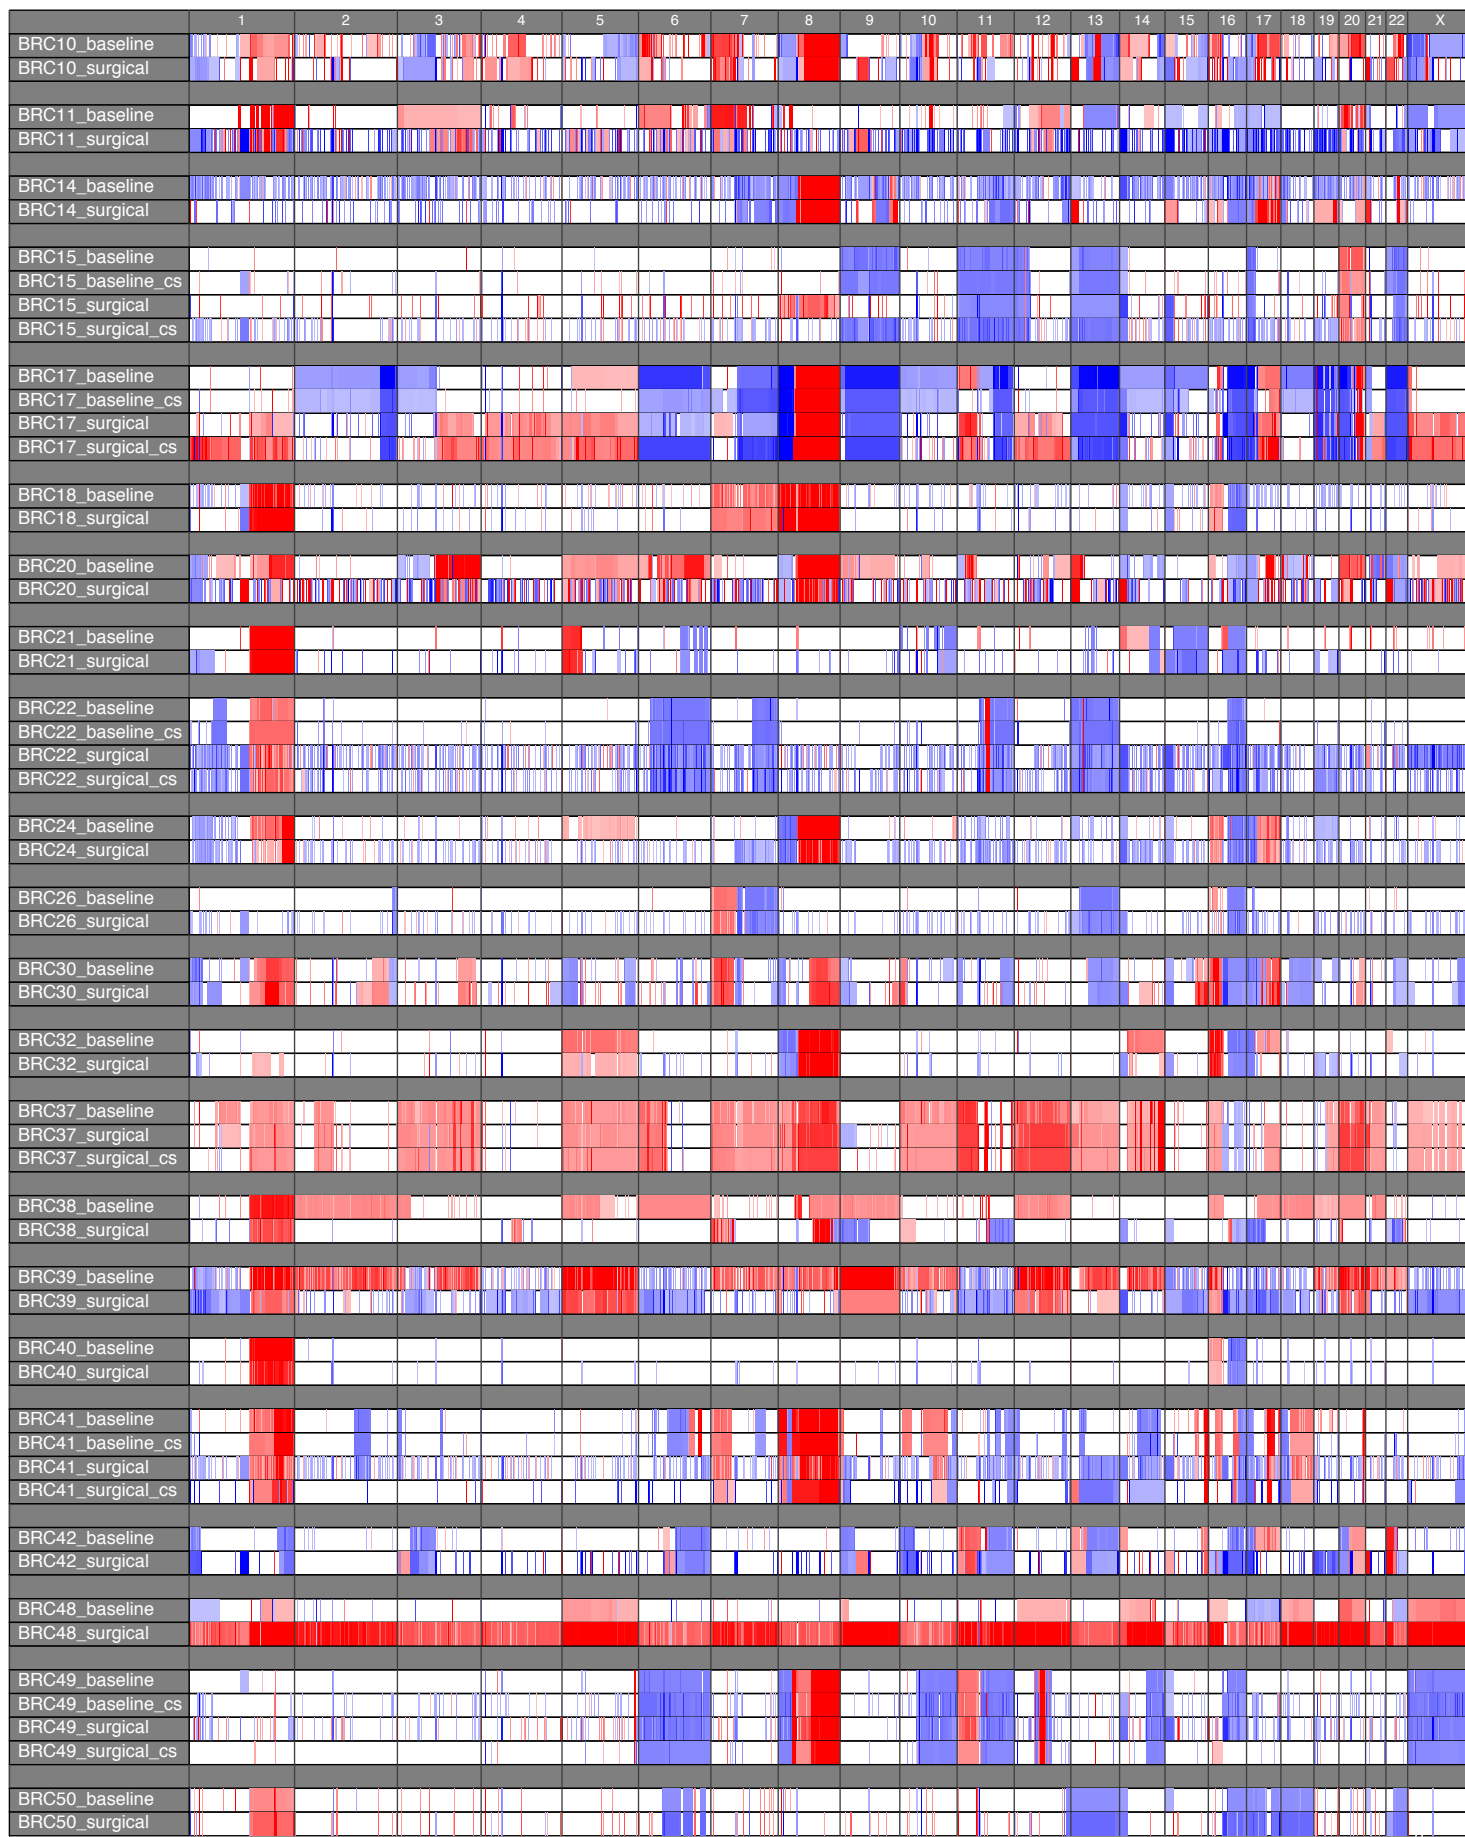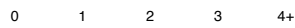

**Supplementary Figure 2: Expression Clustering of all samples.** Heatmap display of hierarchical clustering of the top 5000 most variably-expressed genes in all samples

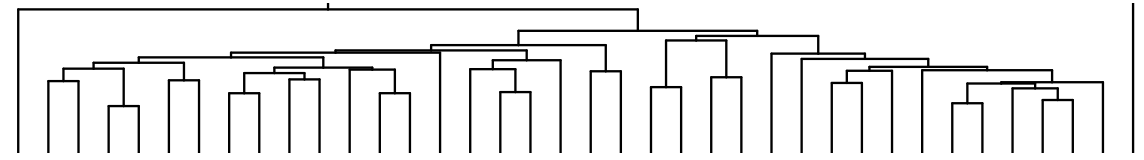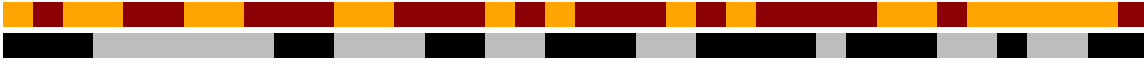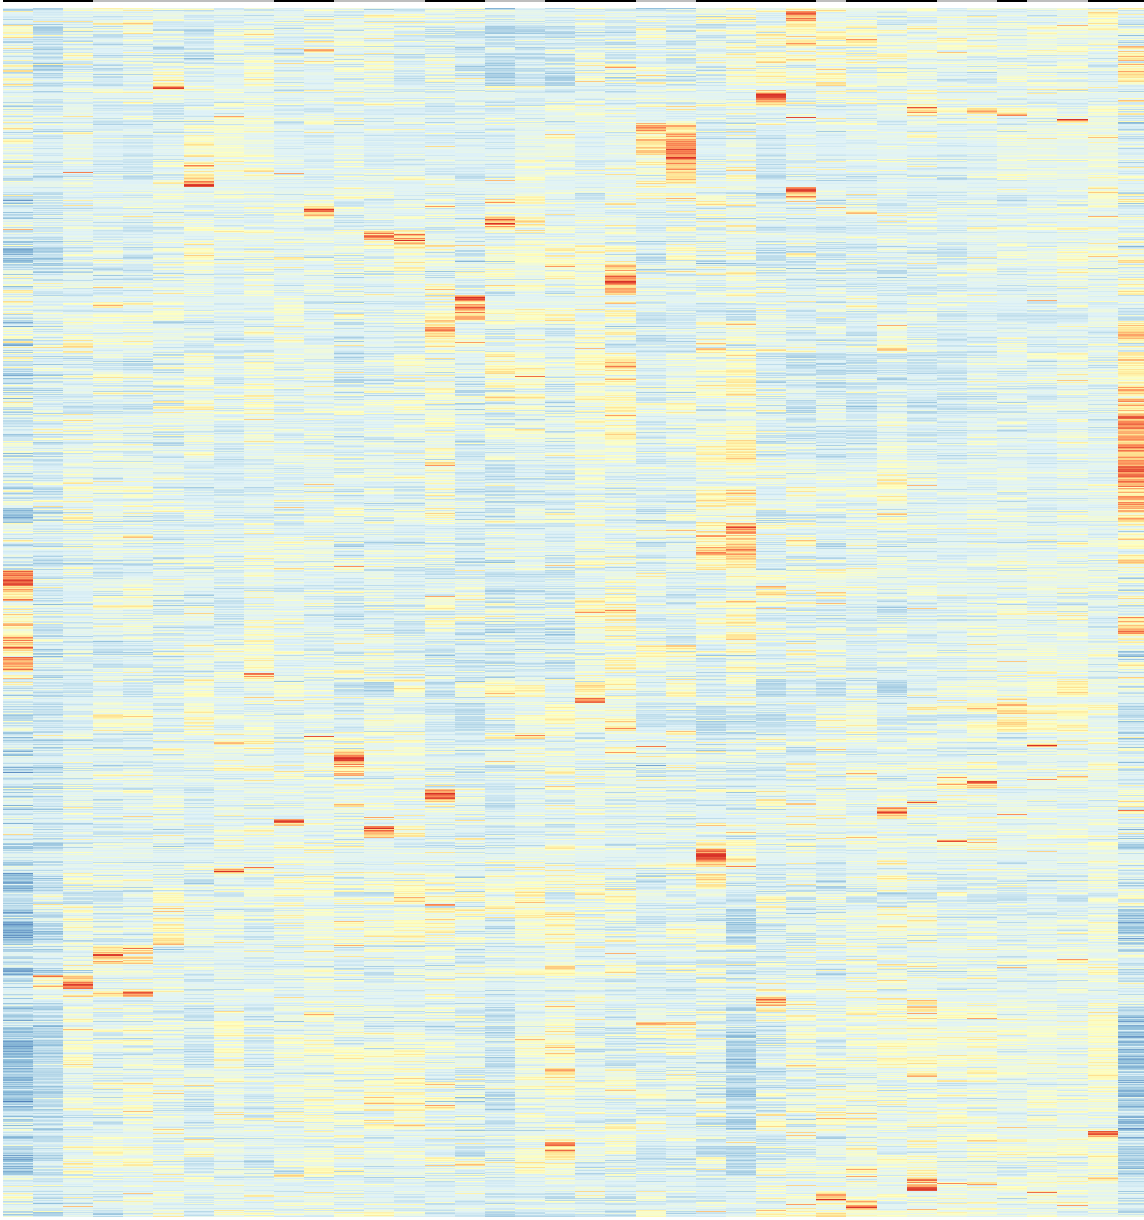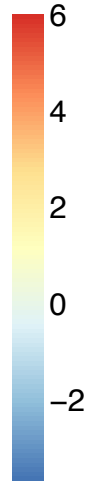

**Sample**  
Surgical  
Baseline

**Response**  
AI-resistant  
AI-sensitive

BRC15  
BRC22  
BRC48  
BRC39  
BRC42  
BRC50  
BRC50  
BRC18  
BRC15  
BRC21  
BRC38  
BRC22  
BRC18  
BRC26  
BRC26  
BRC11  
BRC11  
BRC10  
BRC42  
BRC10  
BRC24  
BRC24  
BRC14  
BRC14  
BRC17  
BRC37  
BRC37  
BRC38  
BRC40  
BRC32  
BRC30  
BRC30  
BRC20  
BRC20  
BRC49  
BRC49  
BRC41  
BRC41  
BRC14



**Supplementary Figure 3: Expression Clustering of baseline samples.** Heatmap display of hierarchical clustering of the top 5000 most variably-expressed genes in 20 baseline samples

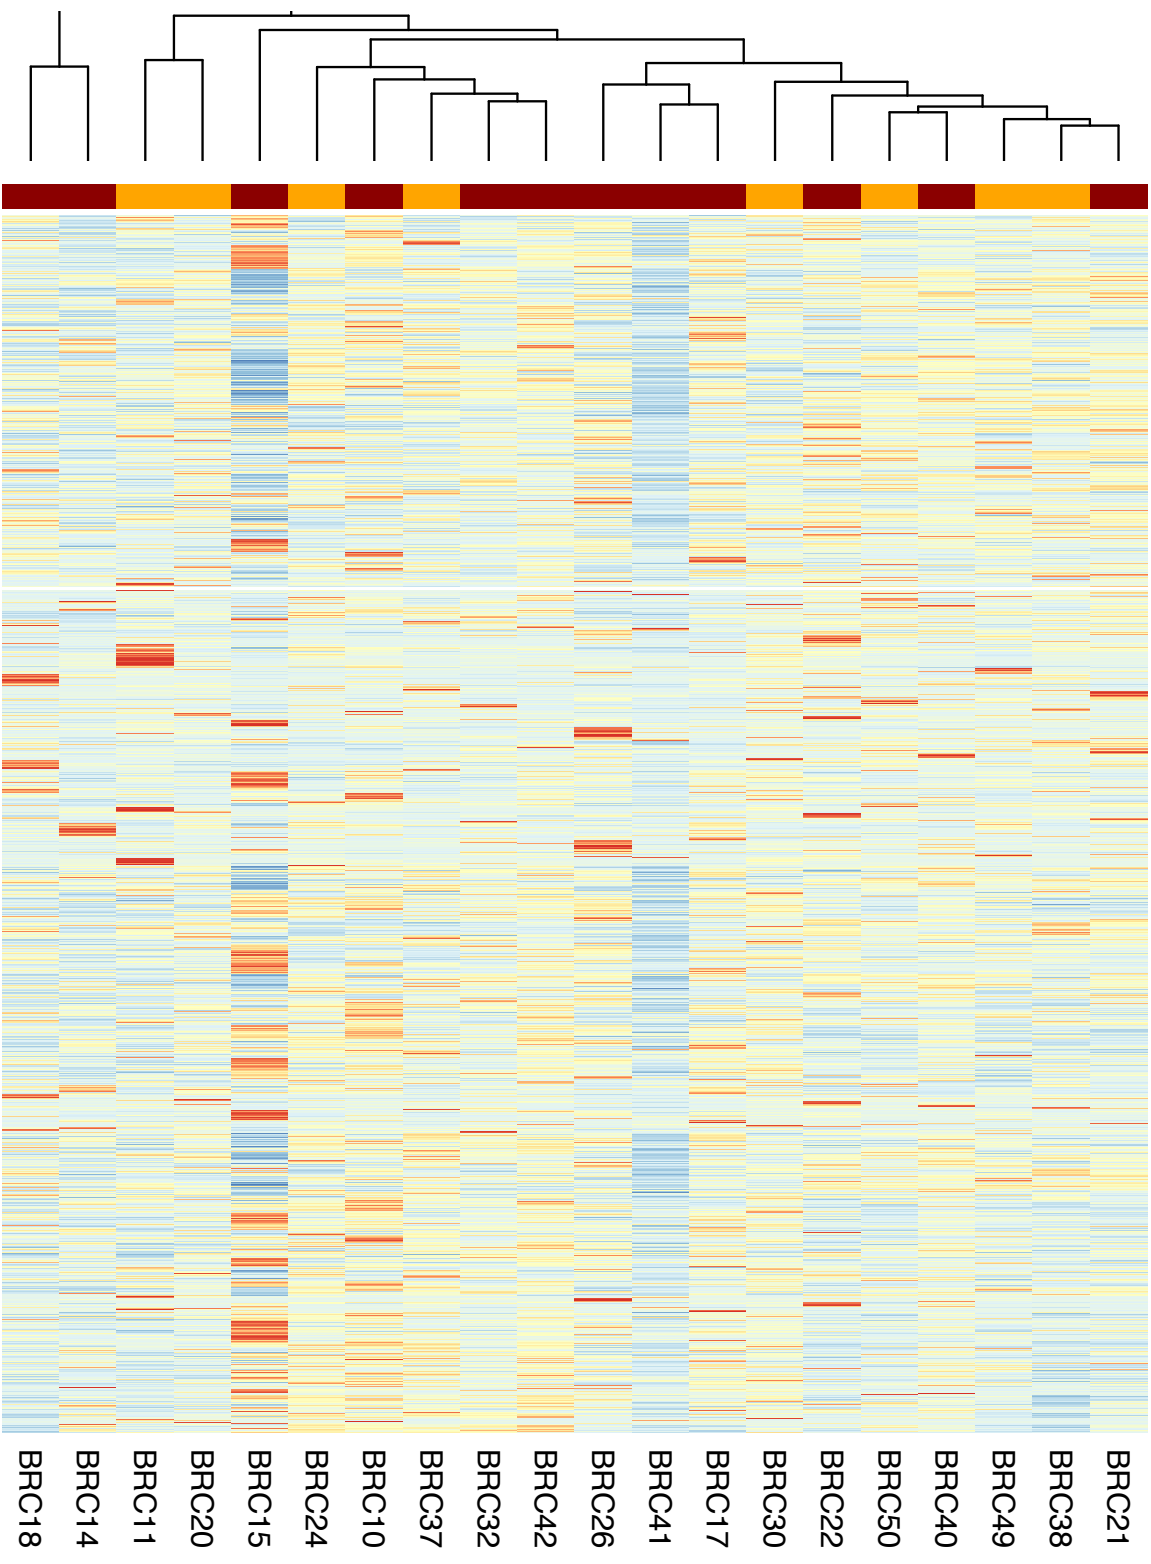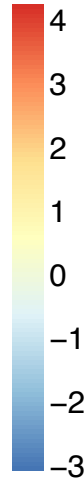

**Therapy**  
AI-resistant  
AI-sensitive

**Supplementary Figure 4: Expression Clustering of surgical samples.** Heatmap display of hierarchical clustering of the top 5000 most variably-expressed genes in 18 surgical samples

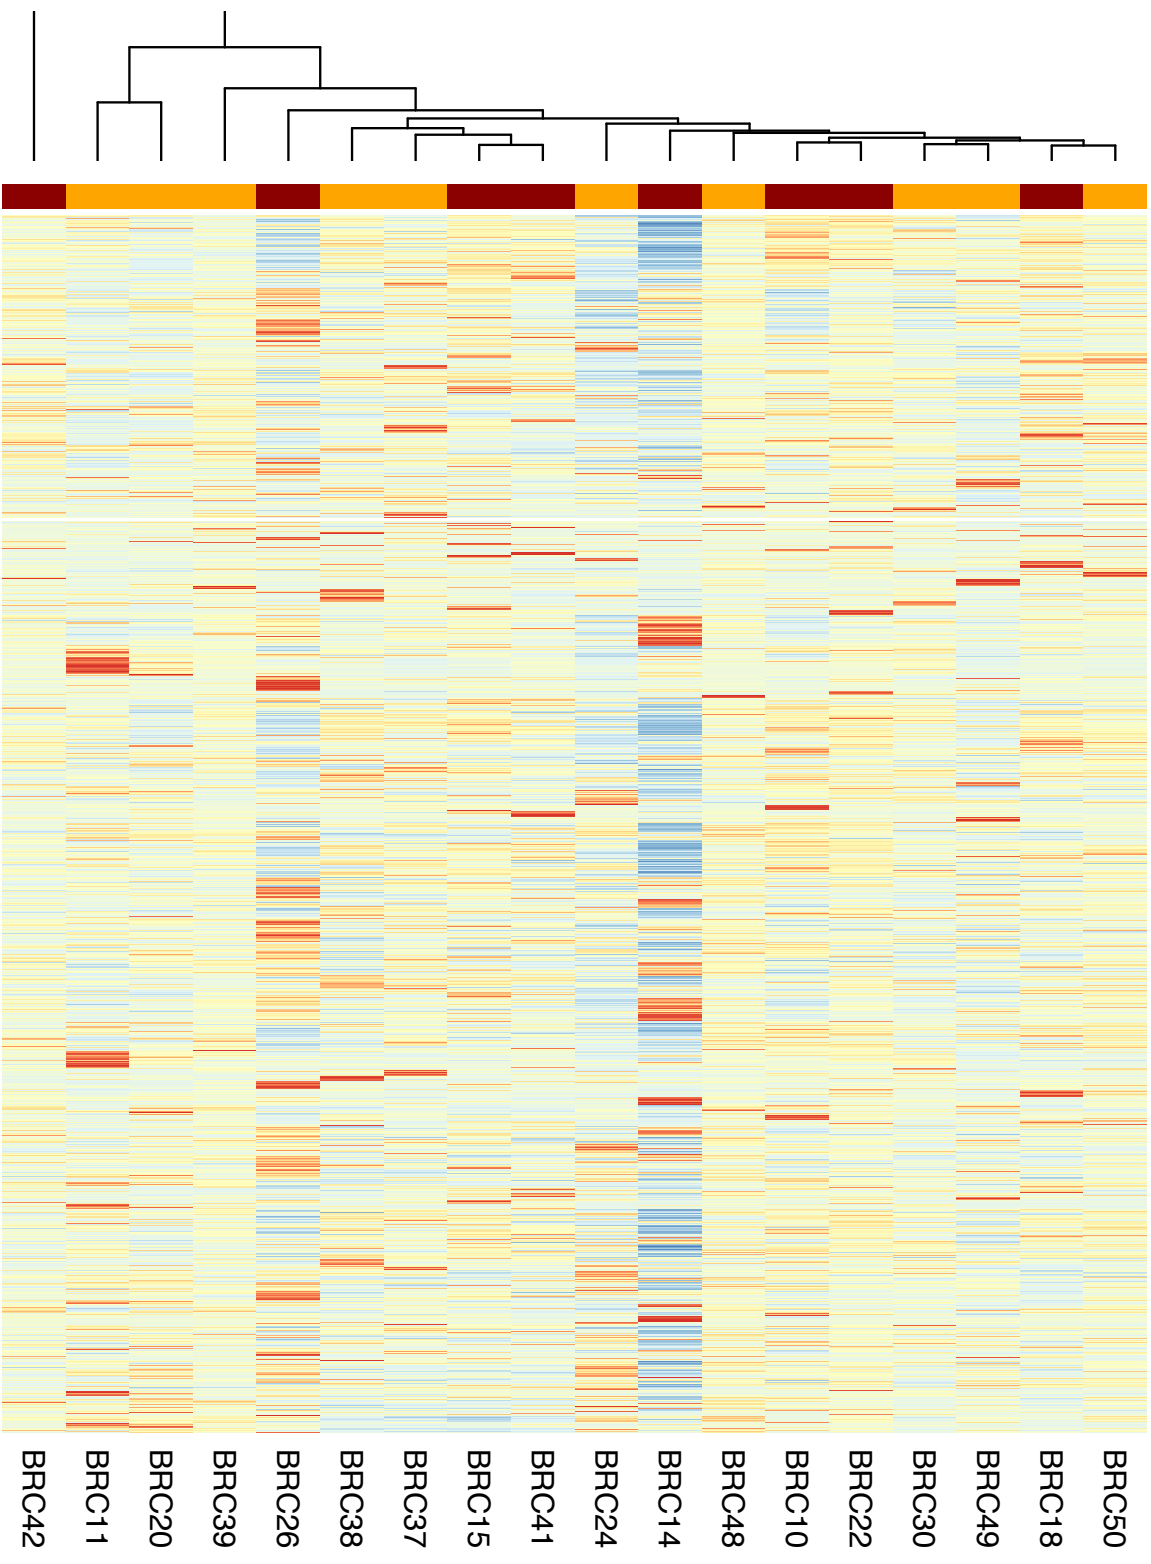

**Therapy**  
■ AI-resistant  
■ AI-sensitive

**Supplementary Figure 5: Expression Clustering of baseline Luminal A samples.** Heatmap display of hierarchical clustering of the top 5000 most variably-expressed genes in all baseline LumA samples

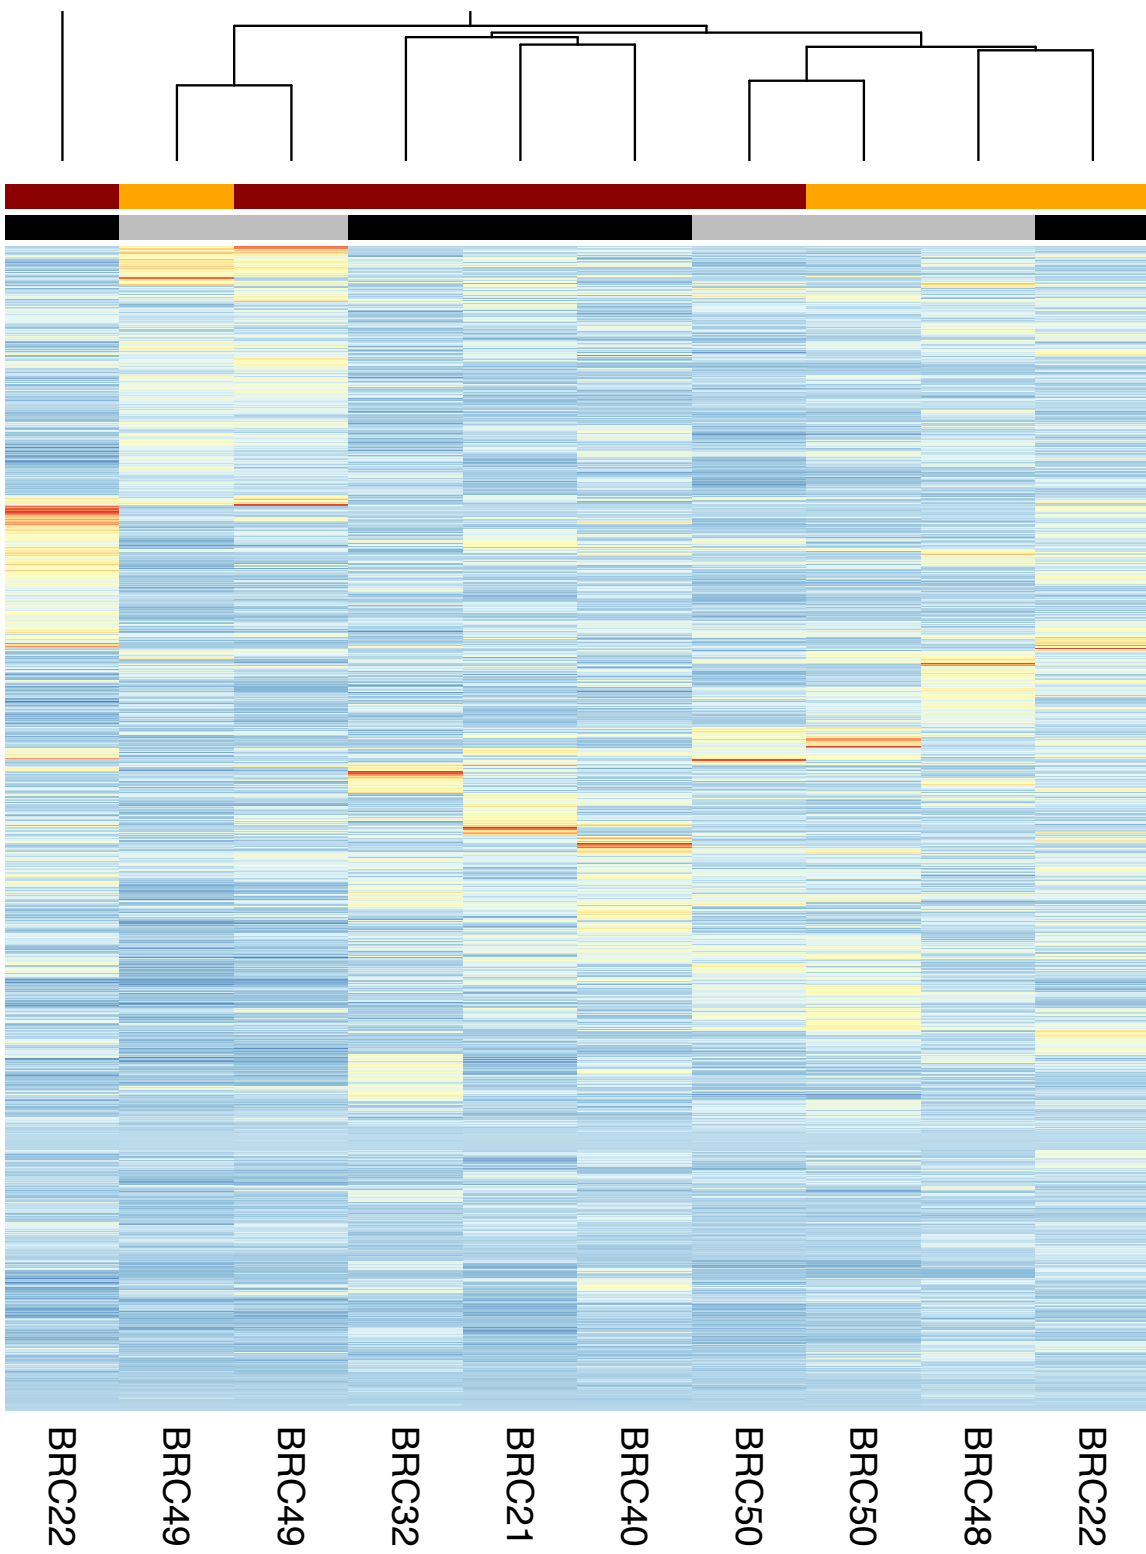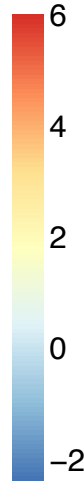

**Sample**  
Surgical  
Baseline

**Response**  
AI-resistant  
AI-sensitive

**Supplementary Figure 6: Expression Clustering of baseline Luminal B samples.** Heatmap display of hierarchical clustering of the top 5000 most variably-expressed genes in all baseline LumB samples

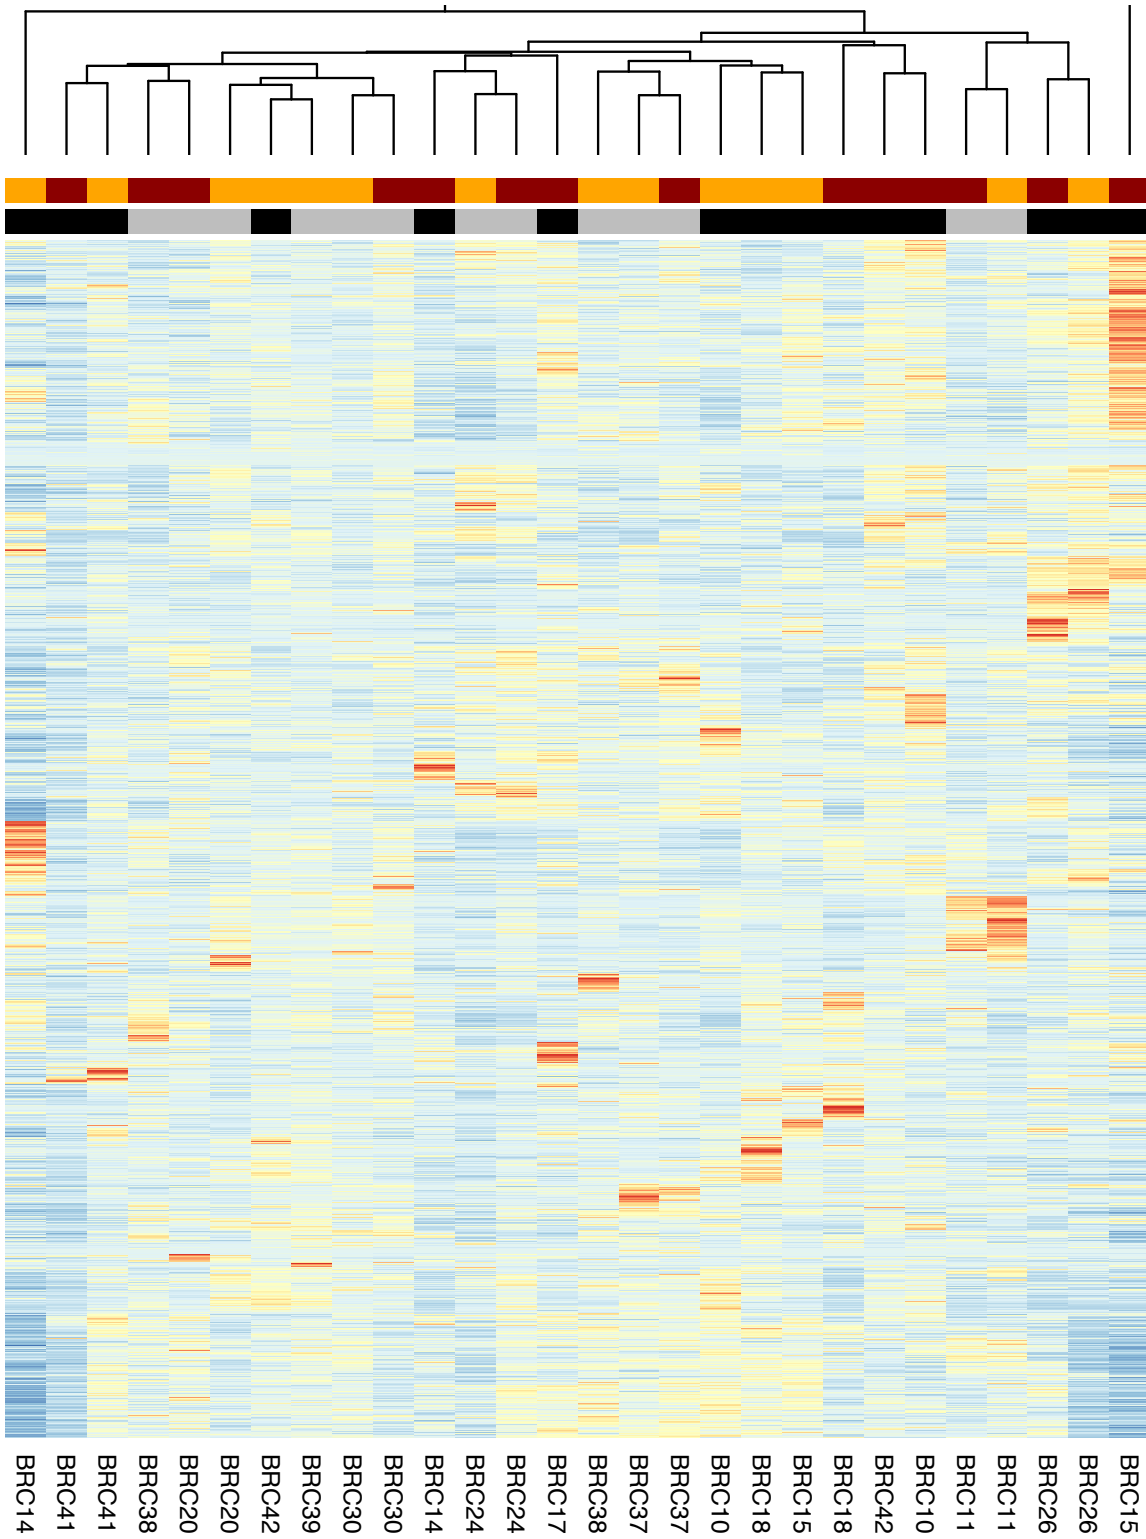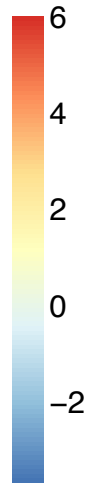

**Sample**  
Surgical  
Baseline

**Response**  
AI-resistant  
AI-sensitive



**Supplementary Figure 7: Clonality inference for all samples**

**BRC10**

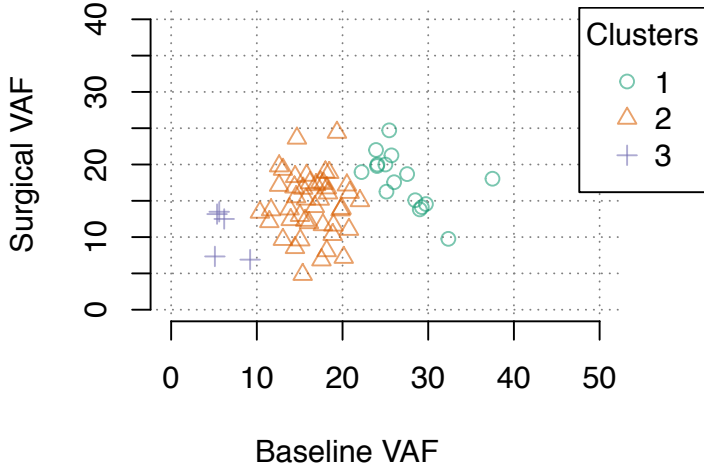

**BRC11**

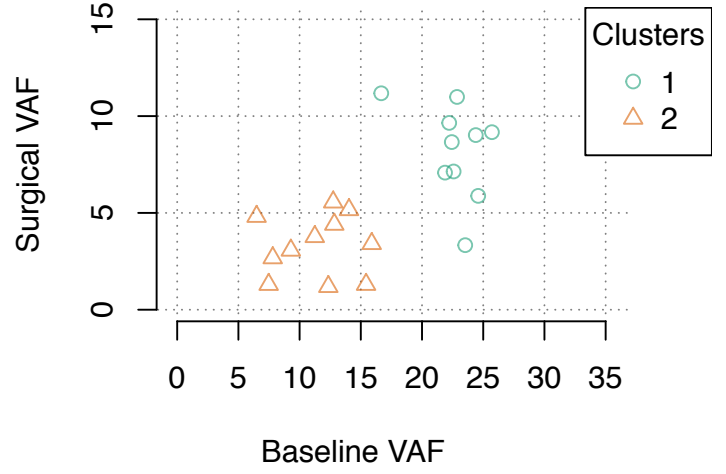

**BRC14**

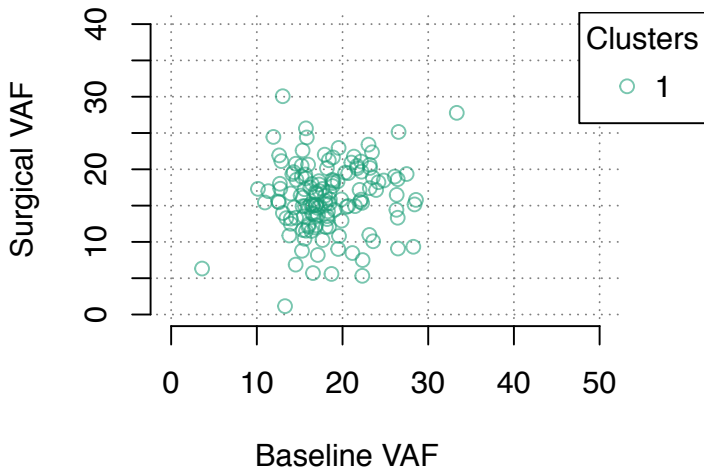

**BRC15**

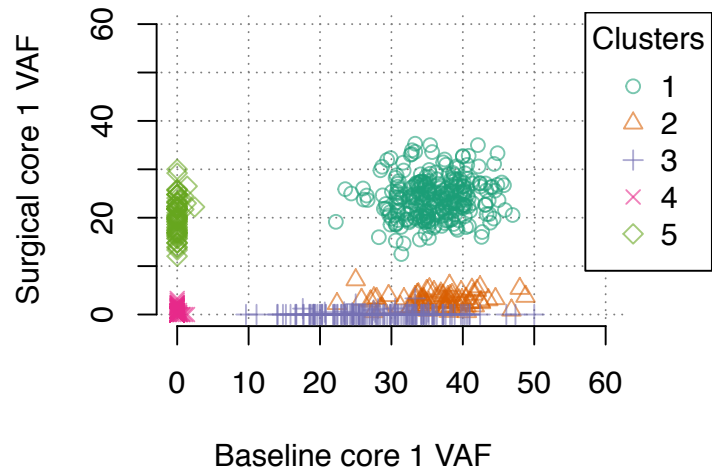

**BRC15**

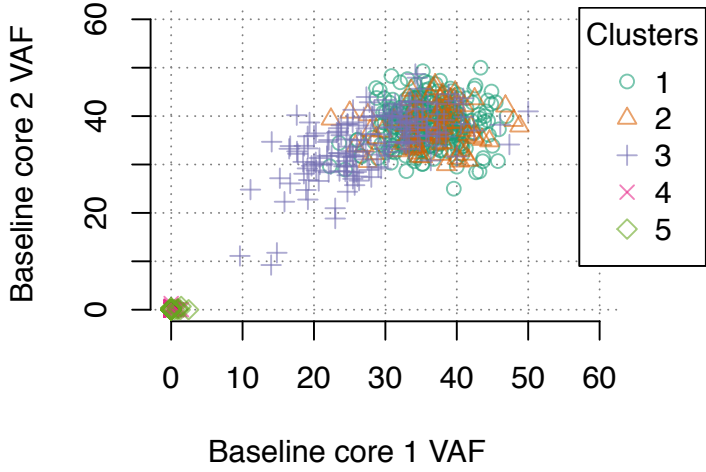

**BRC15**

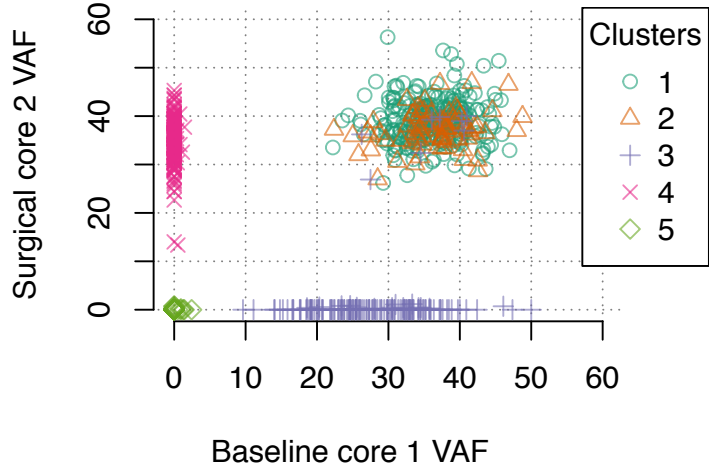

**BRC15**

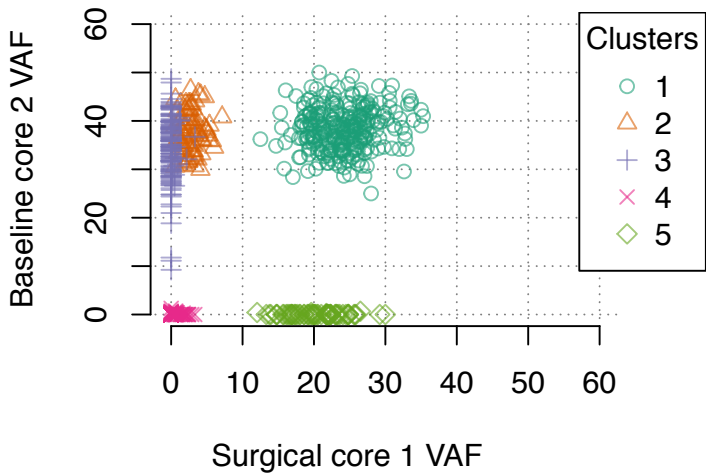

**BRC15**

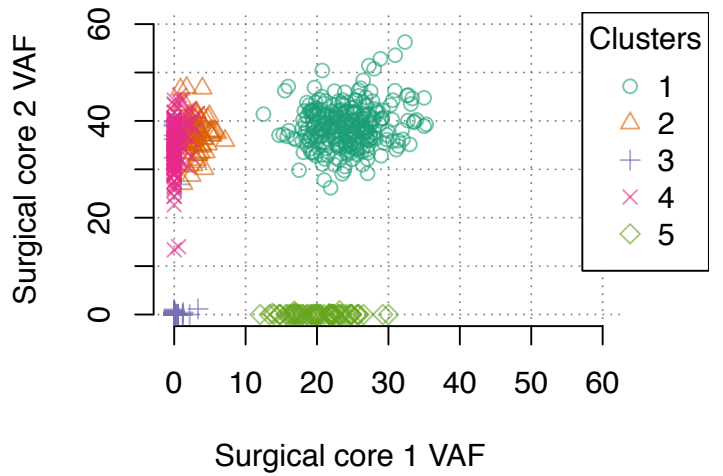

**BRC15**

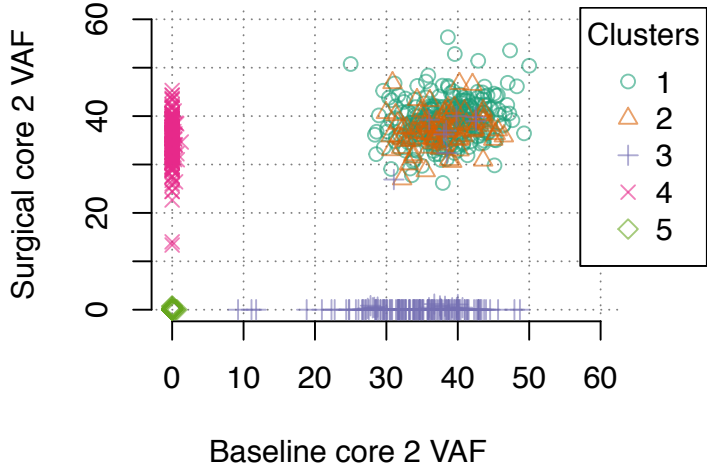

**BRC20**

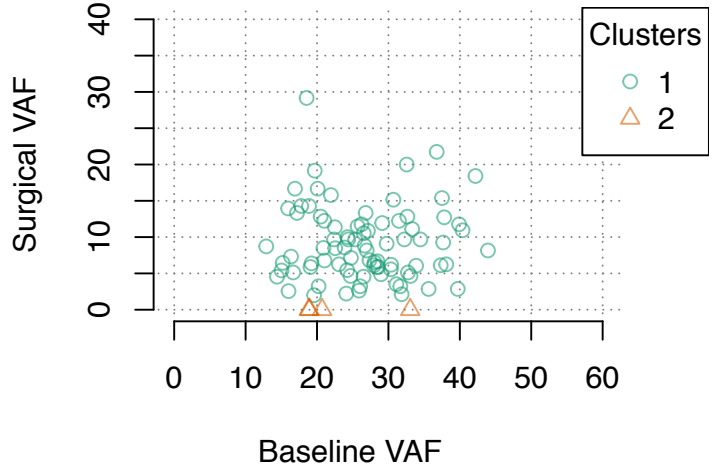

**BRC21**

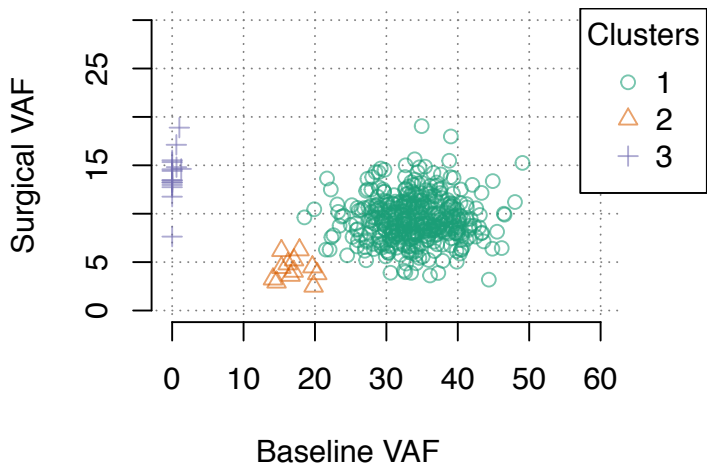

**BRC22**

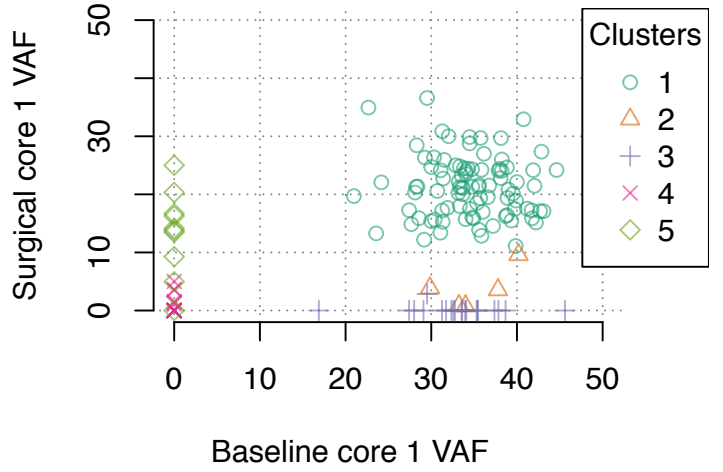

**BRC22**

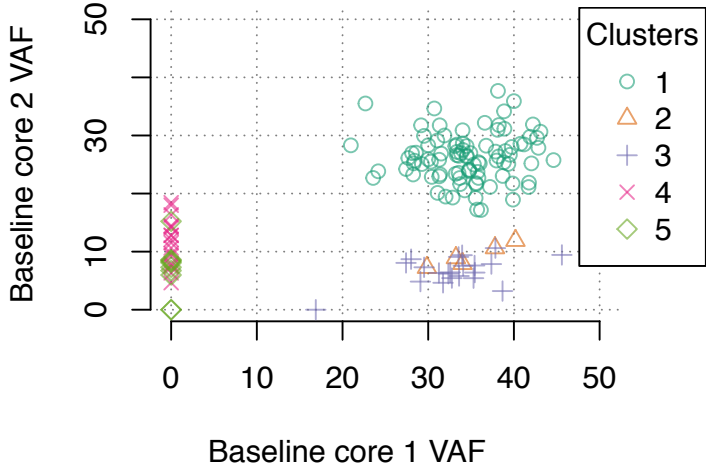

**BRC22**

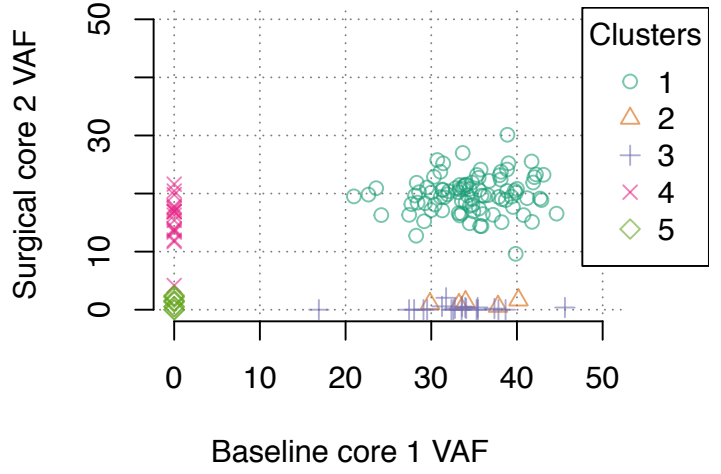

**BRC22**

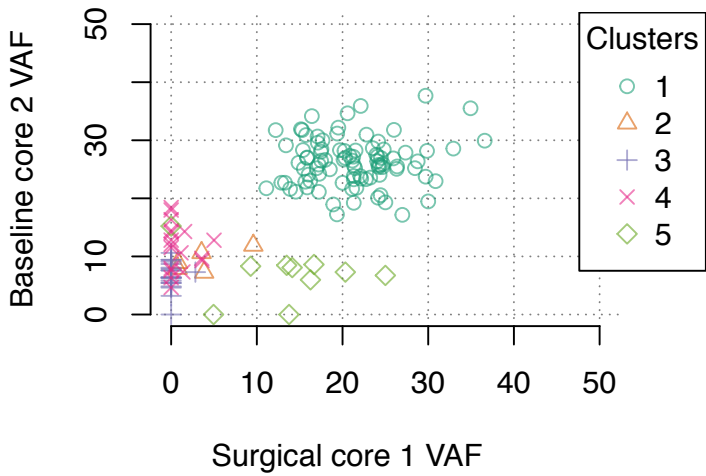

**BRC22**

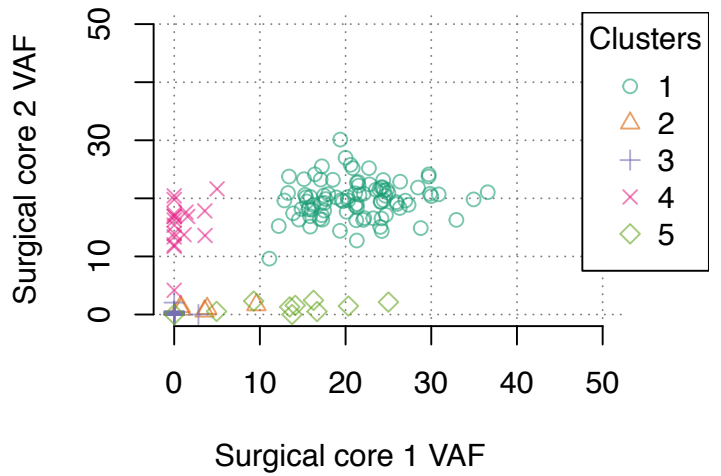

**BRC22**

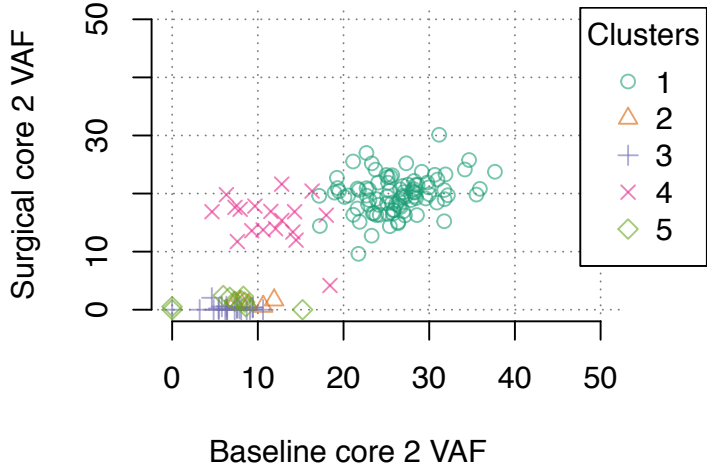

**BRC24**

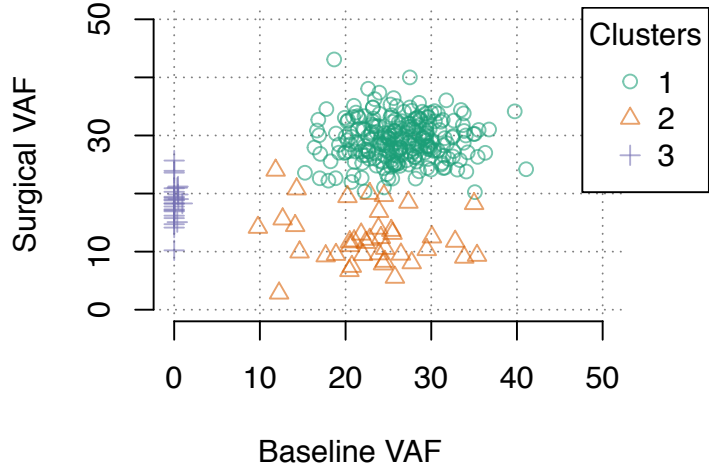

**BRC26**

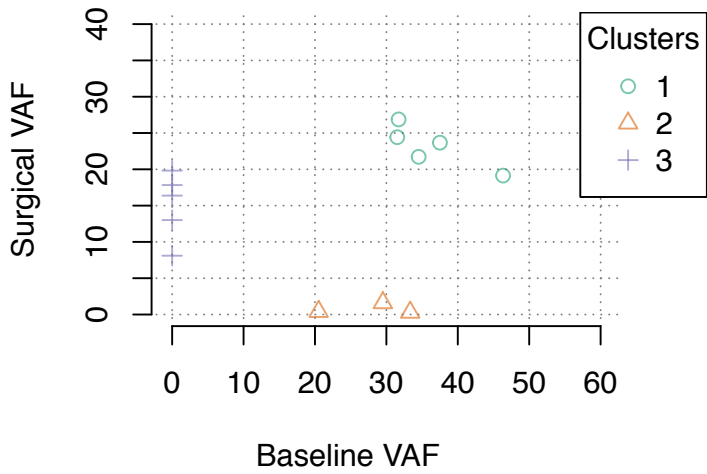

**BRC30**

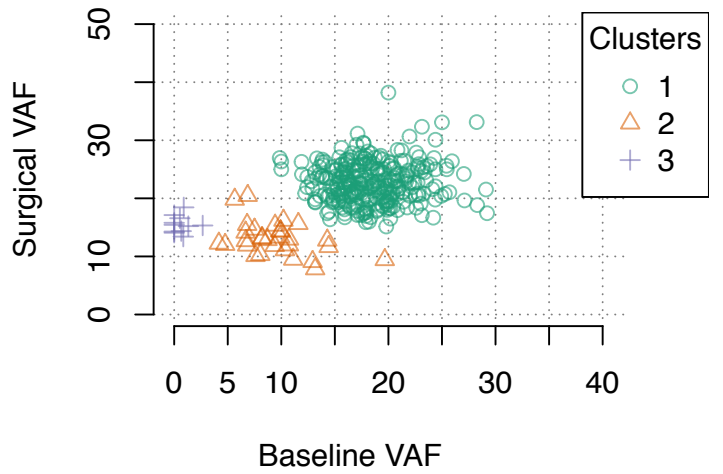

**BRC32**

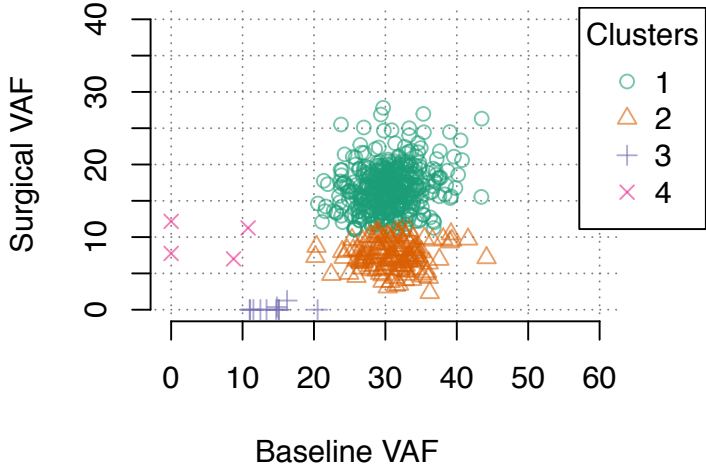

**BRC37**

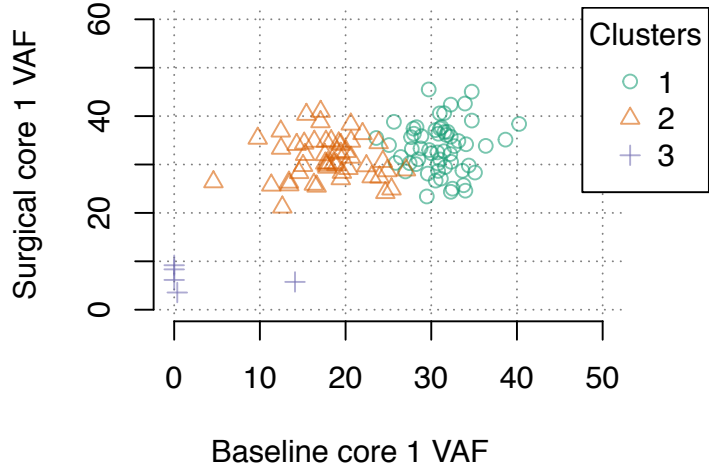

**BRC37**

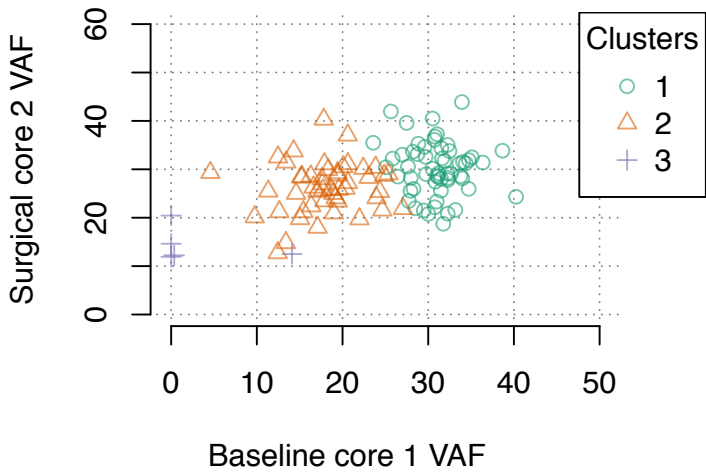

**BRC37**

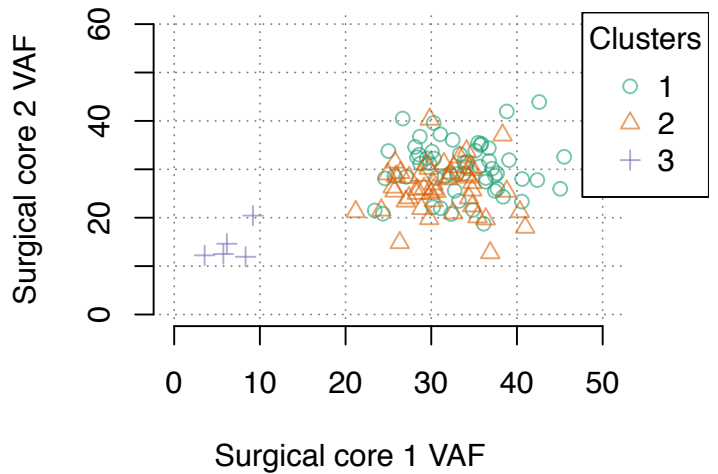

**BRC38**

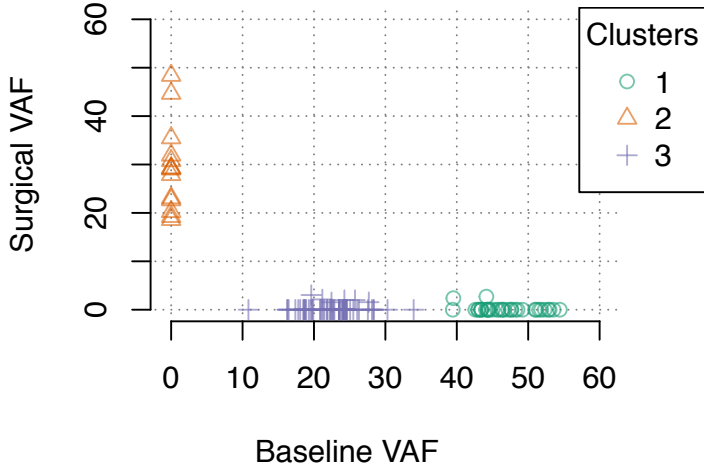

**BRC39**

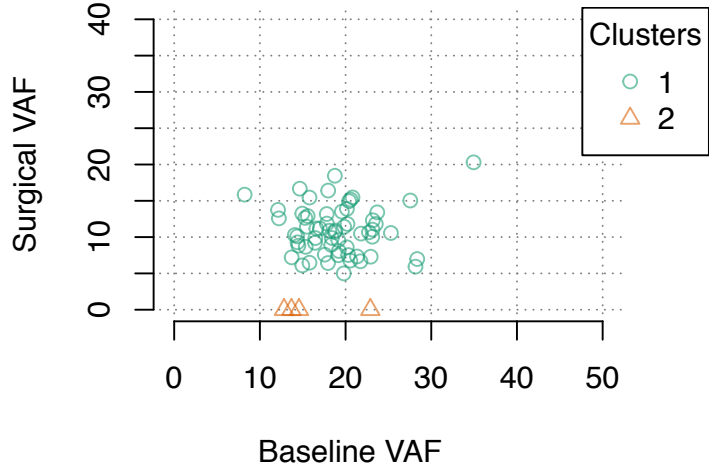

**BRC40**

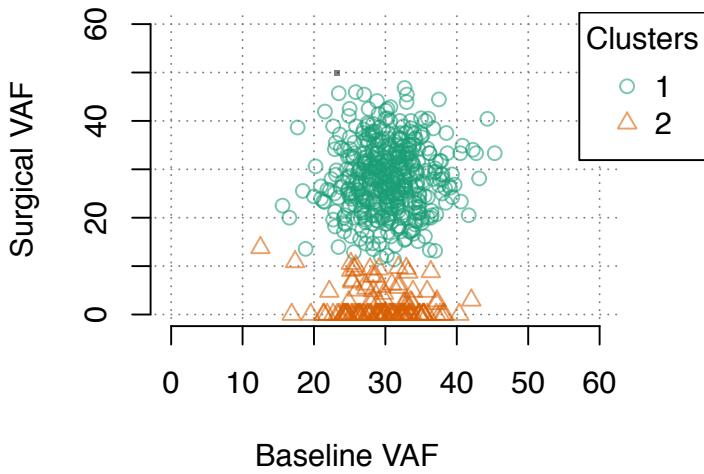

**BRC41**

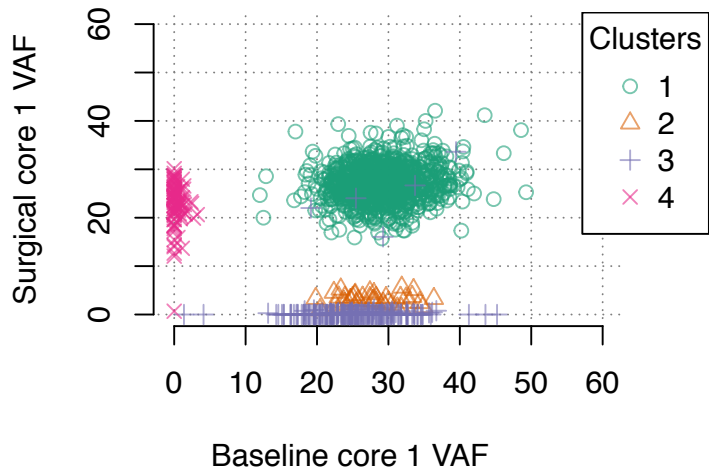



**BRC41**

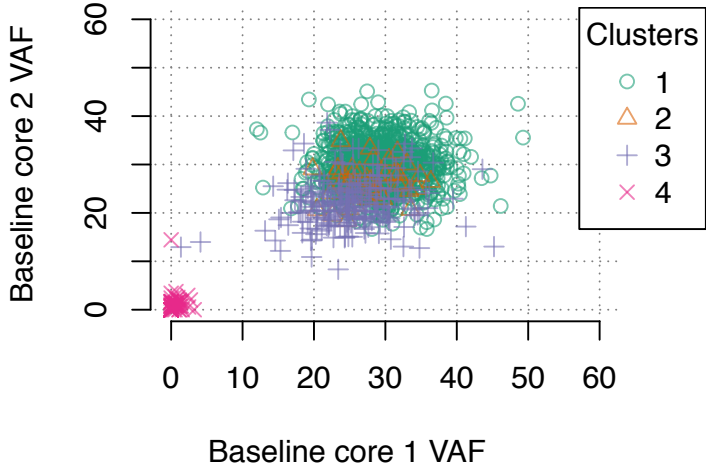

**BRC41**

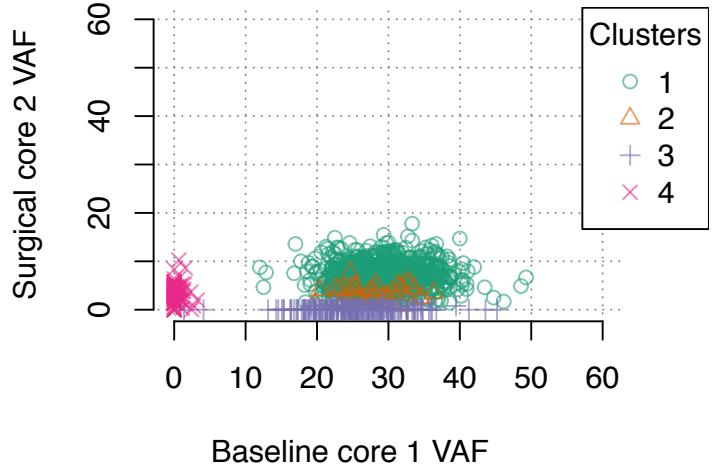

**BRC41**

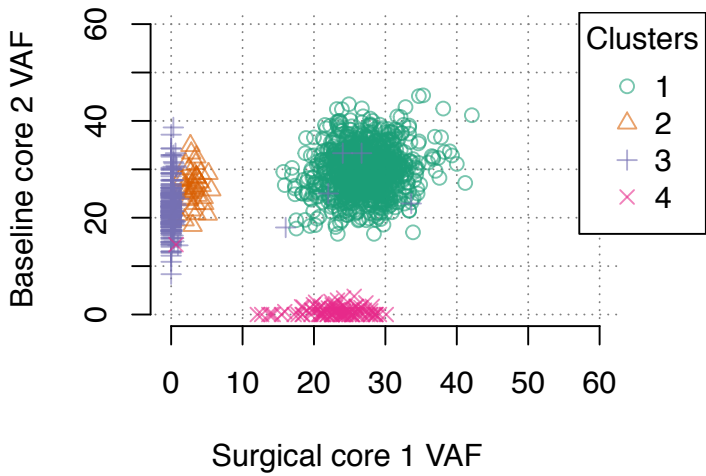

**BRC41**

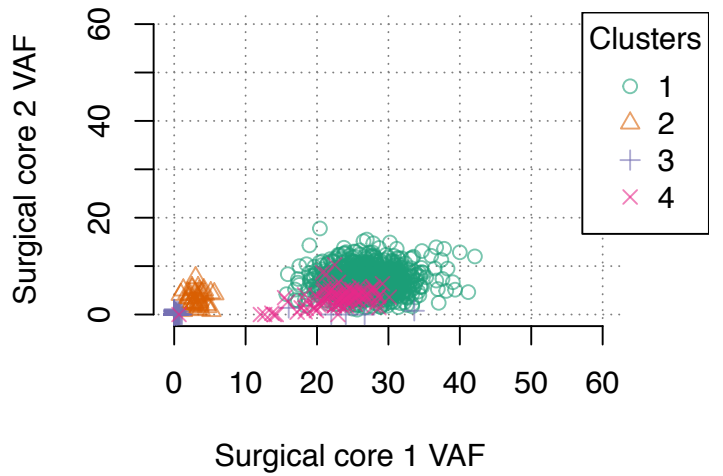

**BRC41**

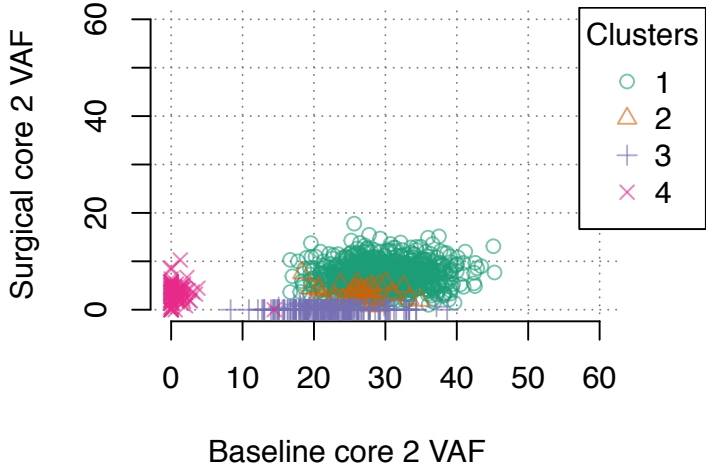

**BRC42**

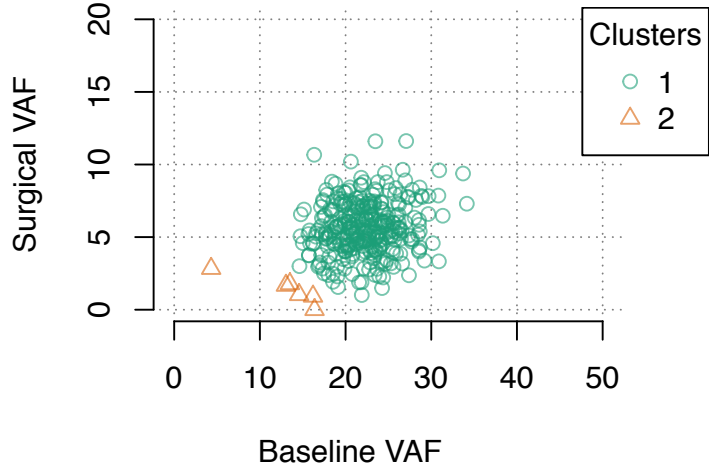

**BRC49**

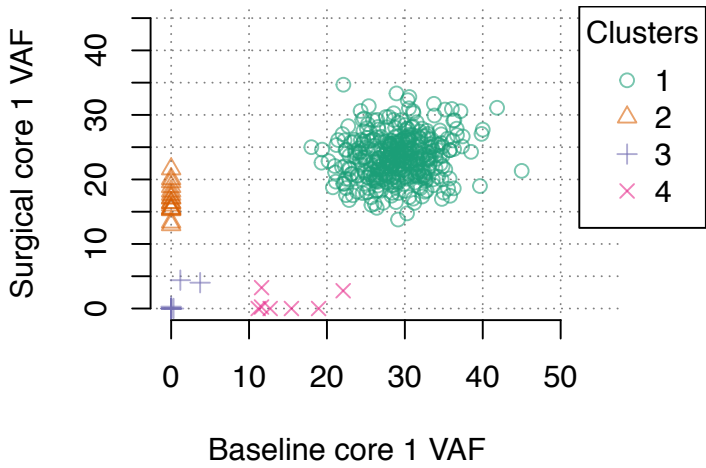

**BRC49**

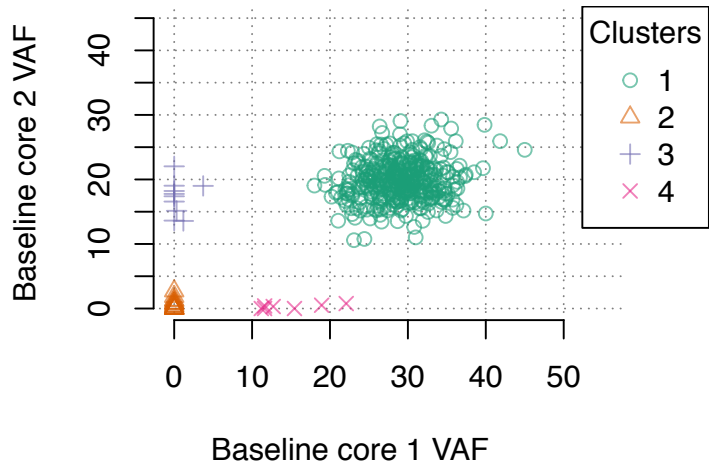

**BRC49**

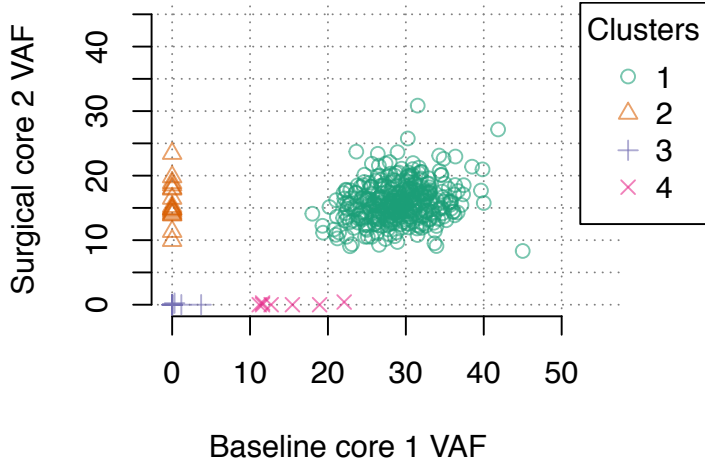

**BRC49**

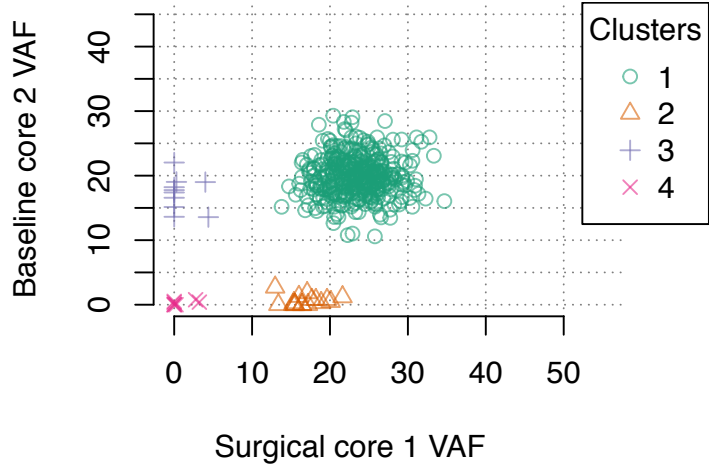

**BRC49**

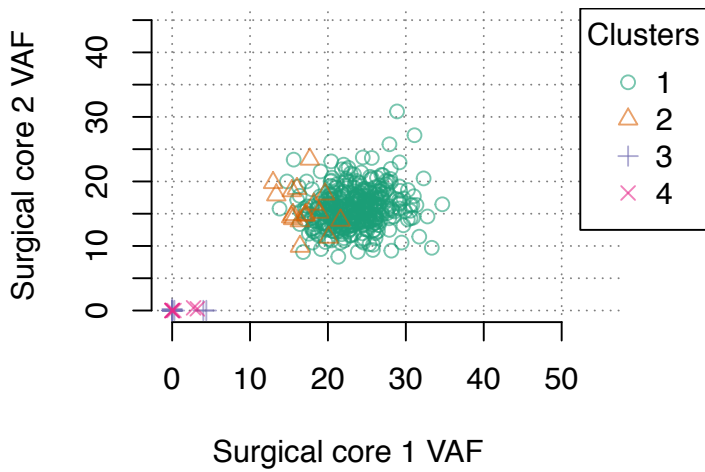

**BRC49**

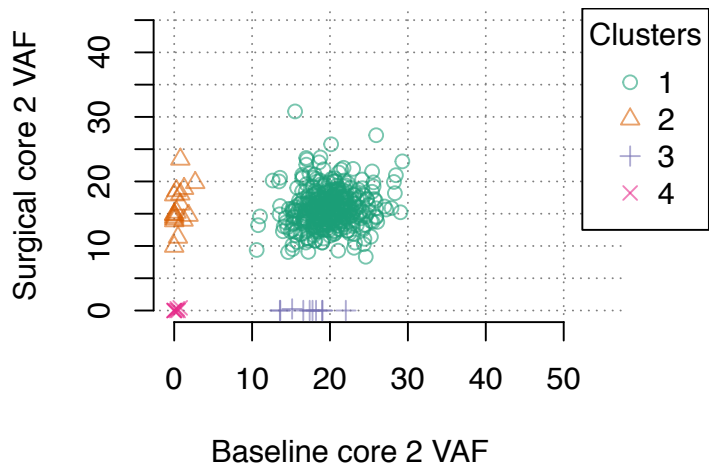

**BRC50**

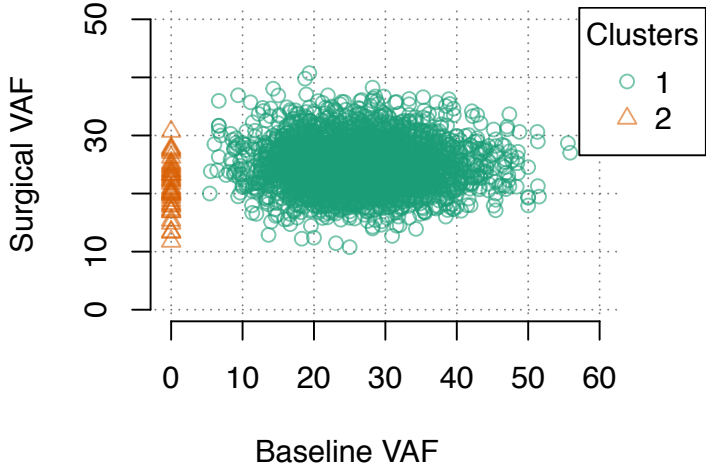

**BRC17**

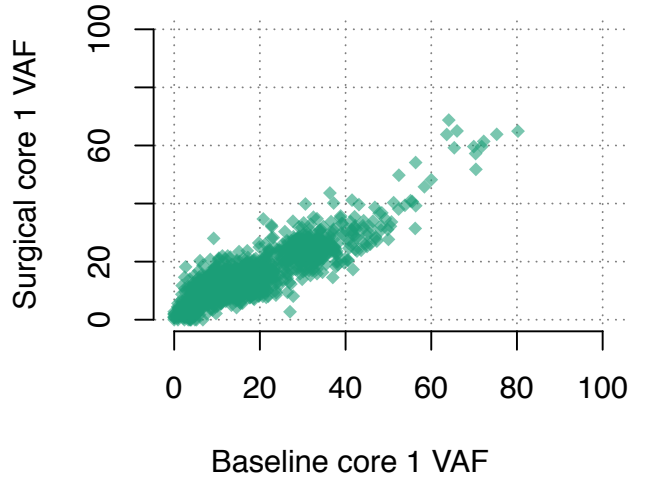

**BRC17**

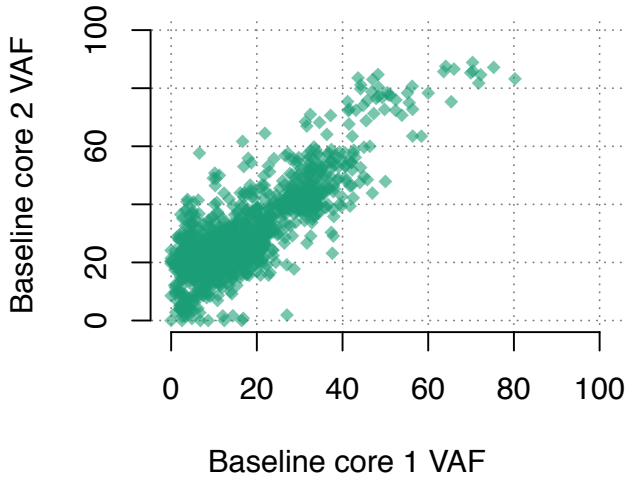

**BRC17**

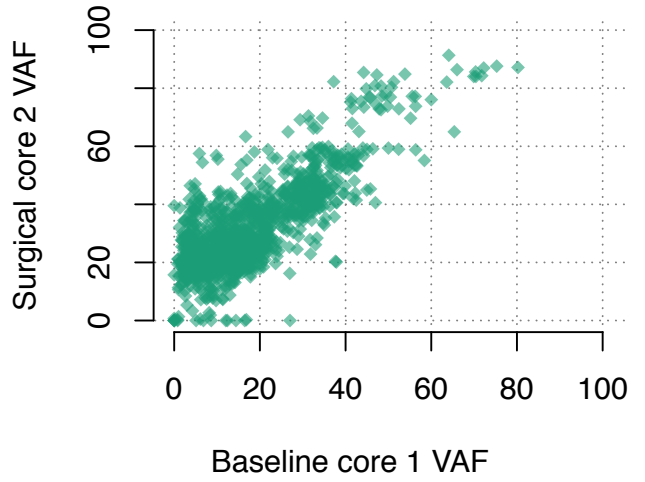

**BRC17**

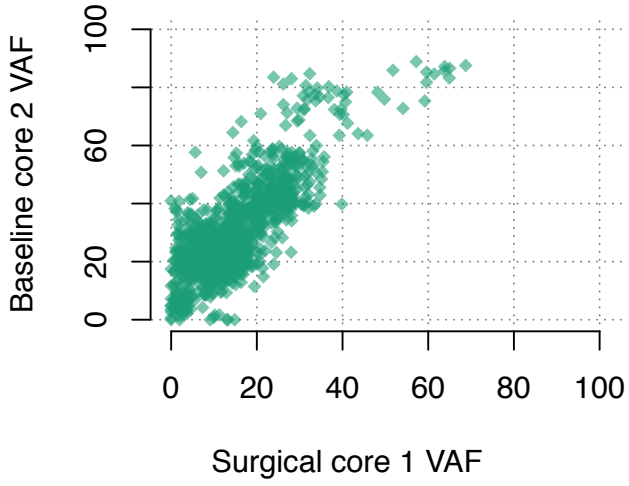

**BRC17**

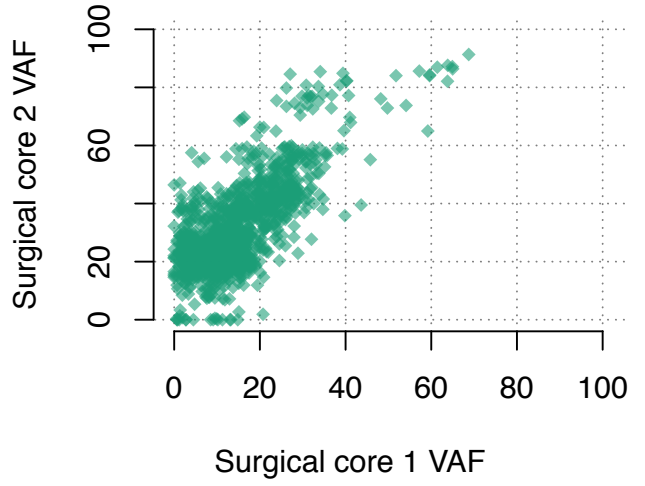

**BRC17**

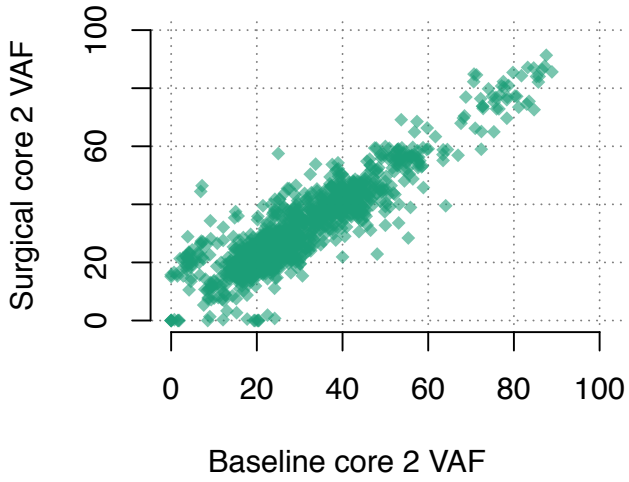

**BRC18**

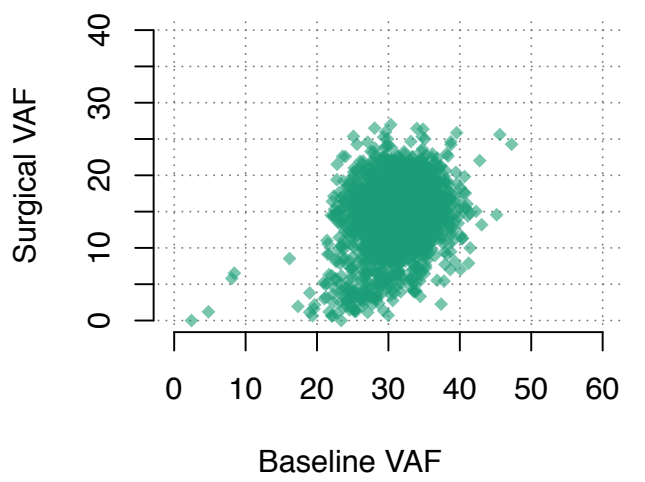

**BRC48**

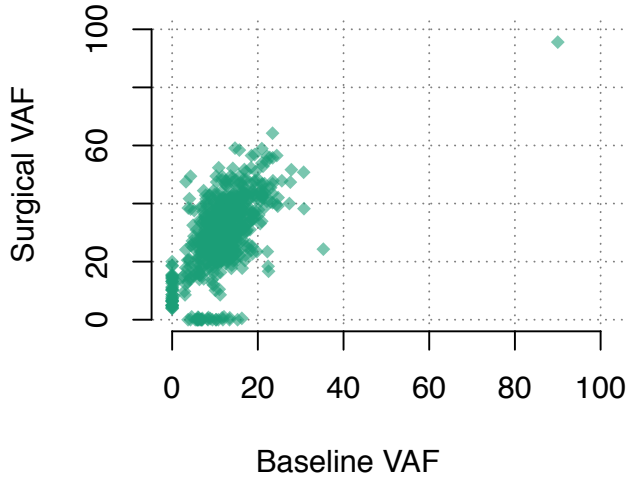

**Supplementary Figure 8: VAF changes of mutations in key genes in the extension cohort.**  
No gene had a shift in a positive or negative direction that reached significance in this cohort.

VAF change (Post-Pre)

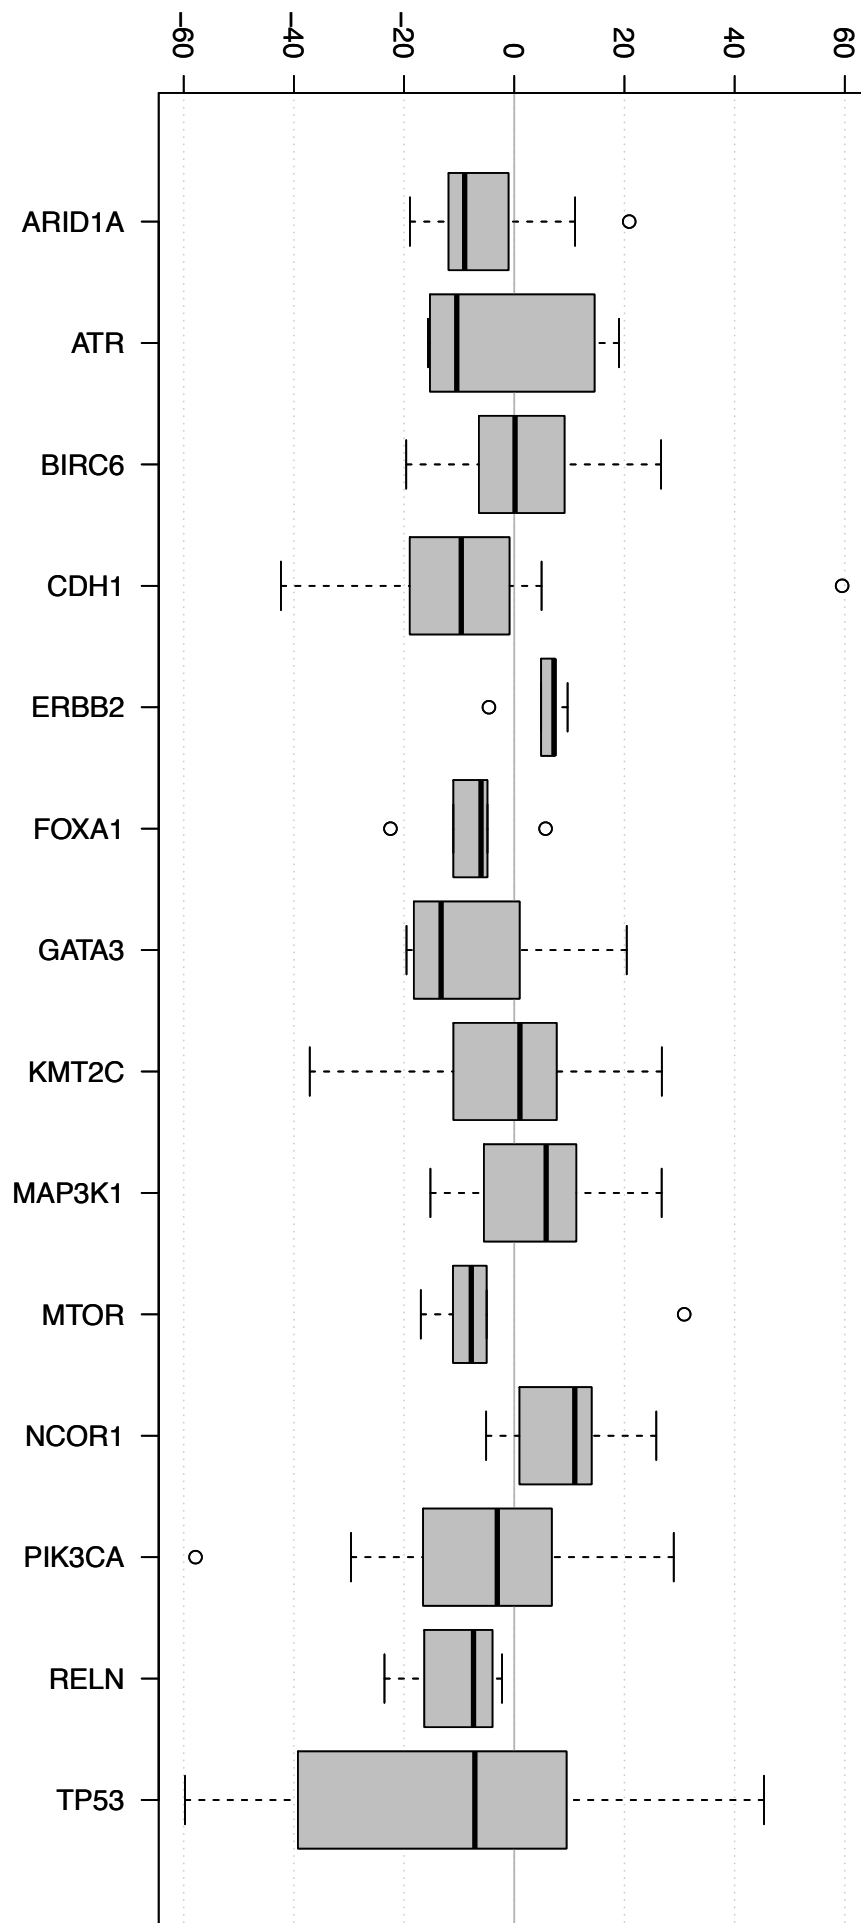



## **Supplementary Notes**

### **Supplementary Note 1: Integrated Analysis of DNA and RNA**

30.6% of all coding mutations were expressed at detectable levels in the RNA data. In an attempt to identify specific drivers of response and resistance, baseline- and surgical-specific variants were identified and further subset to retain only expressed variants. Key cancer-related mutations found specifically in surgical samples include BCAS3 (p.K533N) and MLLT4 (p.M855L). Mutations observed in the baseline samples but completely absent in the surgical tumors include MSH6 (p.K1140\*), BRAF (p.K601E), FOXA1 (p.R265H), as well as a splice-site mutation in CDH1. In BRC21, we also observe a large reduction in the VAF of a GATA3 splice-site mutation, declining from nearly every cell in the baseline-detected tumor to only about 19% of them. No changes of this type were detected in ESR1 or in related pathway genes. Sixty-two expressed coding mutations were specific to the surgical samples

### **Supplementary Note 2: Identification of Gene Fusions**

With the INTEGRATE algorithm, we utilized both DNA and RNA sequence data to identify putative expressed gene fusion transcripts. Out of 38 samples with RNA sequence data, we detected a total of 612 fusion candidates with supporting reads/evidence in both RNA and DNA sequence data (Supplementary Data 6). Out of these candidates, 147 are “tier1”, having higher confidence due to identification of both encompassing and spanning reads. Cancer-related genes involved in fusions include TP53 (BRC30), JAK1 (BRC41, BRC15, and BRC20), and FLT3 (BRC26 post treatment).

### **Supplementary Note 3: Transcriptome analysis**

RNA sequencing was performed on both pre and post-treatment tumors, allowing us to do detailed differential expression analysis. We identified 44 genes that were differentially expressed between the AI-sensitive and AI-resistant tumors (Supplementary Data 8): 24 genes with higher expression in AI-resistant samples and 20 genes with higher expression in AI-sensitive tumors.

Unsupervised hierarchical clustering of FPKM values grouped 16 of the 32 baseline and surgical samples from the same patient together (Supplementary Figure 4), indicating that in those cases, inter-tumor expression variability was greater than expression changes induced by therapy. Such clustering failed to find a clear signature that differentiates between AI-sensitive and AI-resistant tumors, whether given inputs of baseline, surgical, or all tumors (Supplementary Figures 5-6), and whether we evaluated all genes or a subset of the most variable genes. Clustering of Luminal A and B tumors independently also did not distinguish between response classes (Supplementary Figures 7-8).

While transcription levels of estrogen-receptor pathway genes (as defined by GO terms or KEGG pathways) were often variable between timepoints, differences in their transcription levels between baseline and surgical samples did not have a clear relationship to the clonal instability of the tumor or the response to therapy.

#### **Supplementary Note 4: Spatial organization of the tumors**

All cores were taken according to the study protocol, but the locations would have been essentially random due to two factors: The first is that when dealing with fresh tissue biopsies, the center and periphery of the tumor are only grossly identifiable by visual inspection. The second is that this was a multi-center trial and there were no specific guidelines about biopsy location communicated to the many surgeons through the study protocol. Thus, this study cannot answer questions about the spatial organization of the tumors (nor was it designed to).

#### **Supplementary Note 5: DCIS Samples from BRC15**

Three additional samples from the periphery of BRC15 tumor were obtained at surgery, all classified as Ductal Carcinoma in situ (DCIS) by pathology. Each was sequenced with a targeted panel of 83 breast-cancer related genes (Supplementary Data 11). Two of the DCIS samples contained *BIRC6* and *PIK3CA* mutations identical to those observed in the tumor's founder clone, suggesting that they share a genetic origin with the same pre-neoplastic cells that gave rise to the tumor. The third DCIS sample contained the same pair of founder clone mutations, as well as the observed *BRAF* mutation at a VAF of 13.11% (representing about 35% of the tumor cells in that sample). This indicates a shared ancestry between this lesion and the cells that comprised cluster three in the invasive cancer.
